# Supplementary material for: Tolerogenic β2-glycoprotein I DNA vaccine and FK506 as an adjuvant attenuates experimental obstetric antiphospholipid syndrome
Source: PubMed Central journal article supplement (PMC5997307; doi:10.1371/journal.pone.0198821), 2018-06-12
Supplement: pone.0198821.s001.pdf [file pone.0198821.s001.pdf]

| anti-b2 GPI Ab | Normal | Control APS | FK506/APS | B2-GPI DNA/APS | B2-GPI DNA+FK506/APS |
|----------------|--------|-------------|-----------|----------------|----------------------|
|                | 0.076  | 1.541       | 1.223     | 1.223          | 0.612                |
|                | 0.065  | 1.334       | 1.061     | 0.754          | 0.551                |
|                | 0.081  | 1.254       | 0.861     | 0.898          | 0.551                |
|                | 0.061  | 1.331       | 0.884     | 0.884          | 0.931                |
|                | 0.086  | 0.786       | 0.861     | 1.113          | 0.335                |
|                | 0.051  | 0.687       | 1.114     | 0.765          | 0.871                |
