# Supplementary material for: Tolerogenic β2-glycoprotein I DNA vaccine and FK506 as an adjuvant attenuates experimental obstetric antiphospholipid syndrome
Source: PubMed Central journal article supplement (PMC5997307; doi:10.1371/journal.pone.0198821), 2018-06-12
Supplement: pone.0198821.s003.pdf [file pone.0198821.s003.pdf]

| Th1 | Normal | Control APS | FK506/APS | B2-GPI DNA/APS | B2-GPI DNA+FK506/APS |
|-----|--------|-------------|-----------|----------------|----------------------|
|     | 0.6    | 18.9        | 18.1      | 16.6           | 6.8                  |
|     | 0.3    | 20.3        | 16.2      | 16.1           | 6.6                  |
|     | 1      | 17.3        | 19.3      | 10.76          | 7.3                  |
|     | 0.4    | 15.6        | 11.6      | 21.2           | 10.4                 |
|     | 0.3    | 19.6        | 18.6      | 10.8           | 8.7                  |

| Th2 | Normal | Control APS | FK506/APS | B2-GPI DNA/APS | B2-GPI DNA+FK506/APS |
|-----|--------|-------------|-----------|----------------|----------------------|
|     | 0.3    | 0           | 0.4       | 0.2            | 0                    |
|     | 0      | 0.4         | 0.1       | 0.3            | 0                    |
|     | 0      | 0.3         | 0         | 0.2            | 0.3                  |
|     | 0.4    | 0.3         | 0.3       | 0.2            | 0.4                  |
|     | 0.3    | 0.1         | 0.2       | 0              | 0.2                  |

| IL-17A | Normal | Control APS | FK506/APS | B2-GPI DNA/APS | B2-GPI DNA+FK506/APS |
|--------|--------|-------------|-----------|----------------|----------------------|
|        | 11     | 109         | 109       | 124            | 73                   |
|        | 21     | 81          | 87        | 109            | 12                   |
|        | 11     | 109         | 67        | 166            | 51                   |
|        | 28     | 122         | 109       | 120            | 44                   |
|        | 23     | 98          | 33        | 78             | 71                   |
|        | 41     | 67          | 151       | 66             | 31                   |
