# Supplementary material for: Tolerogenic β2-glycoprotein I DNA vaccine and FK506 as an adjuvant attenuates experimental obstetric antiphospholipid syndrome
Source: PubMed Central journal article supplement (PMC5997307; doi:10.1371/journal.pone.0198821), 2018-06-12
Supplement: pone.0198821.s005.pdf [file pone.0198821.s005.pdf]

Foxp3+cd4+

| Normal | Control APS | FK506/APS | B2-GPI DNA/APS | B2-GPI DNA+FK506/APS |
|--------|-------------|-----------|----------------|----------------------|
| 10.9   | 12          | 11.3      | 10.8           | 23.8                 |
| 9.8    | 11.9        | 11.2      | 12.5           | 22.1                 |
| 9.1    | 8.9         | 8.76      | 8.8            | 12.7                 |
| 8.9    | 9.7         | 9.3       | 10.2           | 23.9                 |
| 6.8    | 10.9        | 9.9       | 8.8            | 14.9                 |
