# Supplementary material for: Tolerogenic β2-glycoprotein I DNA vaccine and FK506 as an adjuvant attenuates experimental obstetric antiphospholipid syndrome
Source: PubMed Central journal article supplement (PMC5997307; doi:10.1371/journal.pone.0198821), 2018-06-12
Supplement: pone.0198821.s006.pdf [file pone.0198821.s006.pdf]

IL-10

| Normal | Control APS | FK506/APS | B2-GPI DNA/APS | B2-GPI DNA+FK506/APS |
|--------|-------------|-----------|----------------|----------------------|
| 12     | 65          | 76        | 41             | 183                  |
| 33     | 55          | 42        | 112            | 109                  |
| 39     | 24          | 51        | 41             | 98                   |
| 41     | 41          | 33        | 51             | 54                   |
| 33     | 51          | 87        | 61             | 73                   |
| 12     | 39          | 41        | 123            | 66                   |

TGF-beta

| Normal | Control APS | FK506/APS | B2-GPI DNA/APS | B2-GPI DNA+FK506/APS |
|--------|-------------|-----------|----------------|----------------------|
| 12     | 16          | 12        | 12             | 14                   |
| 0      | 0           | 33        | 0              | 0                    |
| 0      | 24          | 11        | 0              | 0                    |
| 18     | 0           | 0         | 16             | 36                   |
| 21     | 17          | 12        | 21             | 41                   |
| 0      | 24          | 17        | 18             | 34                   |
